# Supplementary material for: Electric field-assisted resonance frequency tuning in free standing nanomechanical devices for application in multistate switching using a phase change material
Source: Royal Society of Chemistry journal article supplement (doi:10.1039/d4nh00463a), 2024-10-22
Supplement: d4nh00463a1.pdf [file d4nh00463a1.pdf]

## SUPPLEMENTARY INFORMATION

### Electric Field assisted Resonance Frequency Tuning in Free Standing Nanomechanical Devices for the Application in Multistate Switching using Phase Change Material

Durgesh Banswar,<sup>1</sup> Jay Krishna Anand,<sup>1</sup> Syed A. Bukhari<sup>3,4</sup>, Sonika Singh<sup>2</sup>, Rahul Prajesh<sup>4</sup>, Hemant Kumar<sup>6</sup>, S.K. Makineni<sup>6</sup>, Ankur Goswami<sup>1,2\*</sup>

<sup>1</sup>Department of Materials Science and Engineering, Indian Institute of Technology, Delhi, Hauz Khas, New Delhi 110016, India

<sup>2</sup>School of Interdisciplinary Research (SIRe), Indian Institute of Technology, Delhi, Hauz Khas, New Delhi 110016, India

<sup>3</sup>Department of Chemical and Materials Engineering, University of Alberta, Edmonton, AB, T6G 1H9 Canada

<sup>4</sup>Texas Instruments, Dallas, TX 75243, USA

<sup>5</sup>Semiconductor Sensors and Microsystems Group, CSIR-CEERI, Pilani 333031, India

<sup>6</sup>Department of Materials Engineering, Indian Institute of Science, Bengaluru 560012, India  
Email: [agoswami@mse.iitd.ac.in](mailto:agoswami@mse.iitd.ac.in)

#### S1: PLD (a)

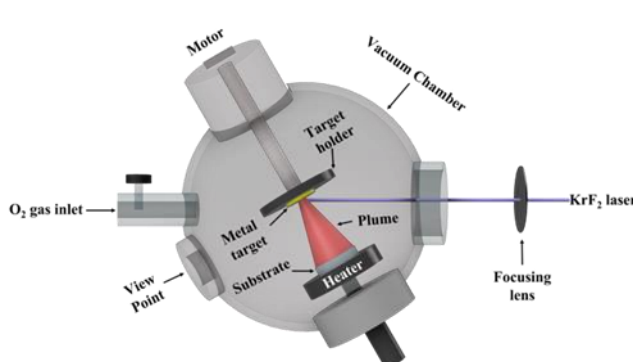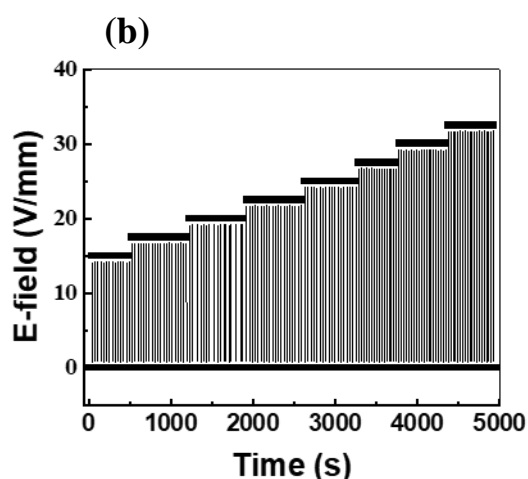

Figure S1:(a) Schematic of the PLD system where nanomechanical resonators were coated by  $\text{TiO}_2$  and followed by  $\text{VO}_2$  from Titanium and Vanadium metal respectively at oxygen atmosphere, (b) pulsed input signal as a function of time applied across nanomechanical resonator to observe mechanical frequency modulation as shown in Fig 6(a).

#### S2 Design Parameters for COMSOL Simulation

To simulate and analyze the performance of Micro-string resonator, 3-D model design of the micro-string were made whose dimension is  $400 \times 3 \times 0.24 \mu\text{m}$  ( $L \times w \times t$ ). This design was used for analyzing resonance frequency shift as a function of temperature. The material properties that were used are given in table (S-1). In the table there are certain properties that are variable such as Elastic modulus that varies with temperature. All the variations in frequency shift with temperature were analyzed in fundamental mode. The module of FEM

32 calculations utilized in this case was Solid Mechanics with physics involving study of Eigen  
 33 frequency shift and thermo-elastic expansion of materials. The parametric sweep of  
 34 temperature ranging from 20-100°C was done to evaluate resonance frequencies corresponding  
 35 to different temperatures. Along with this added mass corresponding to micro-string (VO<sub>2</sub> and  
 36 TiO<sub>2</sub>) was applied in the form of uniformly distributed Load (UDL).

37 **Table S-1: Input dimension and material properties of microstrings used for simulating the effects**  
 38 **of temperature on resonance frequency of VO<sub>2</sub>/TiO<sub>2</sub> coated microstring.**

| S.No. | parameters          | Value                  | Description               |
|-------|---------------------|------------------------|---------------------------|
| 1.    | L                   | 4e <sup>-4</sup> m     | Reference length (x)      |
| 2.    | W                   | 3e <sup>-6</sup> m     | Reference length (y)      |
| 3.    | T                   | 2.4e <sup>-7</sup> m   | Reference length (z)      |
| 4.    | Rho (ρ)             | 3170 kgm <sup>-3</sup> | reference mass density    |
| 5.    | Nu <sub>o</sub> (ν) | 0.2                    | Poisson's ratio           |
| 6.    | α <sub>x</sub>      | 1e <sup>-6</sup> 1/K   | CTE. X-direction          |
| 7.    | α <sub>y</sub>      | 2e <sup>-5</sup> 1/K   | CTE. Y-direction          |
| 8.    | α <sub>z</sub>      | 3e <sup>-6</sup> 1/K   | CTE. Z-direction          |
| 9.    | dT                  | 20 K                   | Initial Temperature Shift |

39

40 As the temperature of the micro-string increases, there is a thermal expansion across the micro-  
 41 string in all the three directions. The thermal strain is given by relation: -

$$42 \quad \varepsilon_{th} = \alpha(T)(T - T_{ref})$$

43 Since the string is clamped at both the end, strain gets restricted resulting in development of  
 44 thermal stress. This thermal stress modifies the overall stress distribution in the system  
 45 affecting the resonance frequency of the micro-string given by the expression: -

$$46 \quad f_i = \frac{i^2 \pi}{2l^2} \sqrt{\frac{EI}{\rho A}} \sqrt{1 + \frac{S'l^2}{i^2 EI \pi^2}}$$

47 Here S' corresponds to overall stress in the micro-string due to tensile stress and thermal load  
 48 stress. The thermal load exerted by SiN<sub>x</sub> is the major dominant factor which affects the overall  
 49 tensile stress exerted on TiO<sub>2</sub>/VO<sub>2</sub> film. The thermal load exerted by SiN<sub>x</sub> is given by the  
 50 relation:-

$$51 \quad Q = mC_p(T - T_{ref}) = k_{SiNx} A \frac{(T - T_{ref})}{t}$$

52 Where,  $m$ ,  $C_p$ ,  $k_{SiN_x}$ ,  $t$  denotes mass, specific heat capacity, thermal conductivity and thickness  
 53 of the  $SiN_x$  material. Higher thermal conductivity ensures faster conduction of heat through the  
 54 material whereas higher  $C_p$  increases the retention time of the heat in the material. Both these  
 55 parameters affects the thermal stress developed in the silicon nitride material which intern  
 56 develops tensile stress on  $VO_2$  material leading to reduction in the resonance frequency.

57 Furthermore, the added mass of  $VO_2$  on  $SiN_x$  further reduces the resonance frequency of the  
 58 micro-string. The Figure S2 below show few images corresponding to fundamental mode at  
 59 different temperatures along with their resonance frequencies.

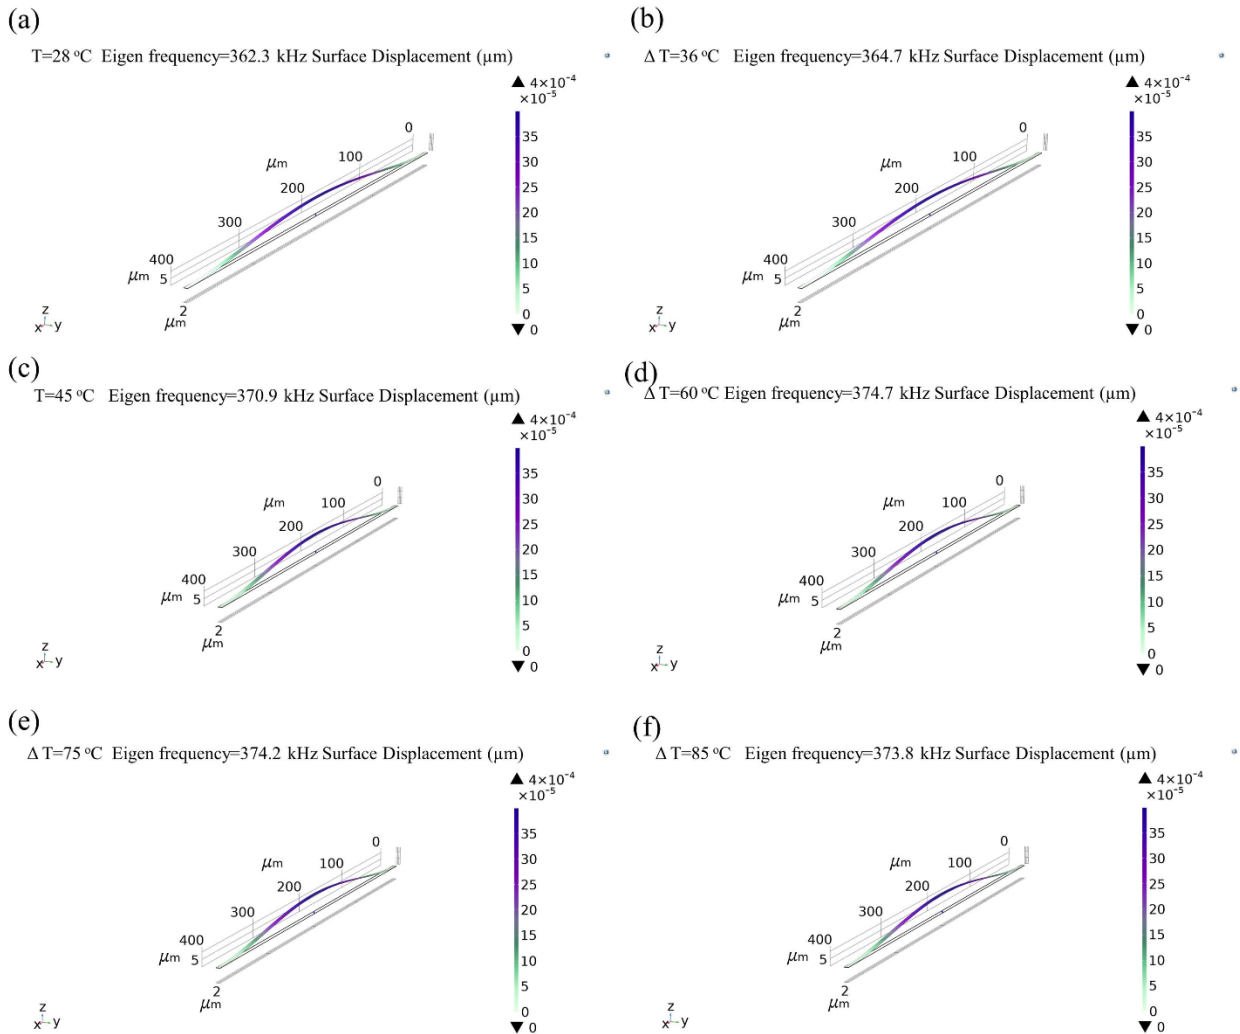

60

61

Figure S2. Simulation of fundamental mode frequency at different temperatures.

62

### 63 S3 Simulation of temperature difference variation due to E-field.

64 In this simulation, Solid mechanics, Heat transfer and Electric current modules were utilized.  
 65 The Multiphysics combining these modules are thermal expansion, thermoelectric effect, and  
 66 electromagnetic heating. Here, the thickness of the string was chosen to be 40 nm. This is  
 67 because E-field is applied across micro-string and the conducting layer is  $VO_2$  and  $TiO_2$

68 whereas SiN<sub>x</sub> is insulating. The properties used in this simulation are summarized in table (S-  
69 2).

70 **Table S-2: Input dimension and material properties of microstrings used for simulation.**

| S.No. | parameters          | Value                                              | Description            |
|-------|---------------------|----------------------------------------------------|------------------------|
| 1.    | L <sub>0</sub>      | 4e <sup>-4</sup> m                                 | Reference length (x)   |
| 2.    | a <sub>o</sub>      | 3e <sup>-6</sup> m                                 | Reference length (y)   |
| 3.    | b <sub>o</sub>      | 40e <sup>-9</sup> m                                | Reference length (z)   |
| 4.    | Rho(ρ)              | 4600 kgm <sup>-3</sup>                             | reference mass density |
| 5.    | Nu <sub>o</sub> (ν) | 0.2                                                | Poisson's ratio        |
| 6.    | α <sub>x</sub>      | 1e <sup>-6</sup> 1/K                               | CTE. X-direction       |
| 7.    | α <sub>y</sub>      | 2e <sup>-5</sup> 1/K                               | CTE. Y-direction       |
| 8.    | α <sub>z</sub>      | 3e <sup>-6</sup> 1/K                               | CTE. Z-direction       |
| 9.    | L                   | 2.44e <sup>-8</sup> V <sup>2</sup> /K <sup>2</sup> | Lorenz number          |
| 10.   | α                   | 1.6e-6 m <sup>2</sup> /s                           | Thermal diffusivity    |

71

72 Apart from this there are couple of parameters such as electrical conductivity and thermal  
73 conductivity, that were derived from experimental data of I-V sweep and resistance (R<sub>T</sub>/R<sub>5</sub>) vs  
74 temperature curve. From I-V sweep which was performed at different temperature, resistance  
75 of VO<sub>2</sub> at 5 °C (R<sub>5</sub>) was found to be around 11.1 MΩ. Once the resistance at different  
76 temperature were obtained then resistivity of the VO<sub>2</sub> were calculated by the relation  $\rho_T = \frac{R_T A}{L_0}$   
77 where A and L<sub>o</sub> represent cross sectional area and length of the micro-string. The inverse of  
78 resistivity then gives the electrical conductivity of the VO<sub>2</sub> material. The thermal conductivity  
79 of the material was finally deduced from the Wiedemann- Franz relation given as: -

80

$$\frac{k}{\sigma} = LT$$

81 Here *k* and  $\sigma$  represents thermal and electrical conductivity of the material, L is the Lorenz  
82 number and is a constant parameter equal to 2.44×10<sup>-8</sup> V<sup>2</sup>/K<sup>2</sup>. When an Electric field is applied  
83 across the micro-string resonator, localized joule heating is generated in the VO<sub>2</sub> string. At  
84 lower E-field, VO<sub>2</sub> is in insulating state and have high resistance. Hence temperature variation  
85 due to current flowing through it is less resulting in less drop of temperature. However, with  
86 increase in E-field, current increases resulting in large temperature changes and thus bringing  
87 VO<sub>2</sub> to its metallic state. The temperature variation across micro-string at different applied E-  
88 Field is shown in Figure S3. The careful observation reveals that the node of maximum  
89 temperature on the micro-string shifts from one end of the string to the other when the E-field  
90 is increased from 2 V/mm to 36 V/mm as shown in Figure S3 (in the supplementary  
91 information). At low E-field, the temperature is linearly decreasing across the microstring. This

92 is because when E-field is applied, the end connected to higher potential will be at high  
 93 temperature as compared to the other end as per Fourier law of heat conduction. However, at  
 94 the initial state of phase transition i.e. at critical field of 17 V/mm, the thermal conductivity  
 95 across the micro-strings varies non uniformly resulting in the non-uniform distribution of  
 96 temperature. In the transition regime, as the monoclinic phase (insulating phase) starts changing  
 97 to rutile phase (conducting) from one terminal to the other, the maximum temperature of the  
 98 micro-string shifts accordingly along the microstring as observed in the Figure S3.

99

100

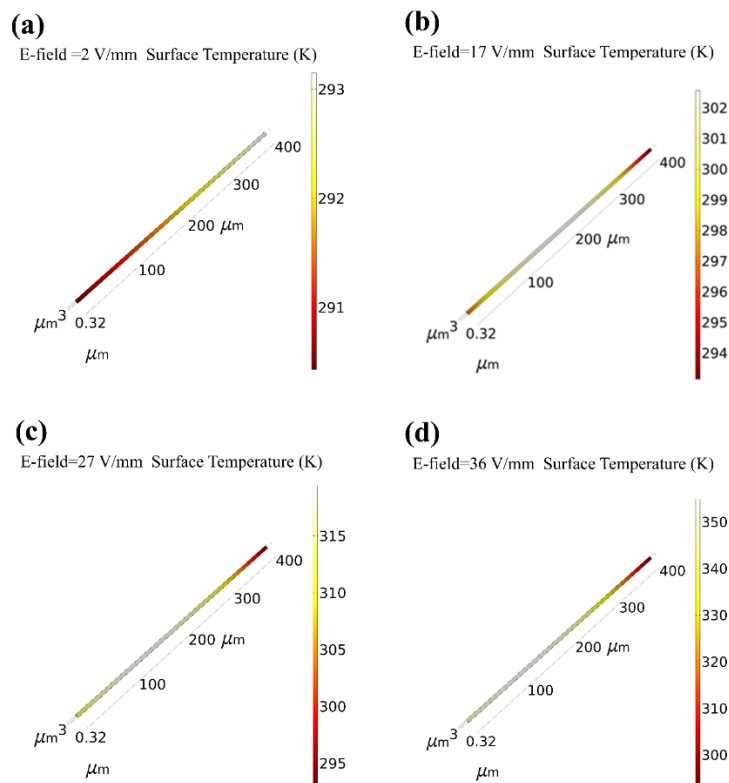

101

102 Figure S3. Simulation of surface temperature of micro-string at different applied E-field.

103 **S4 Electrical measurements:**

104 Current vs voltage (electric field) characteristics were performed on the contact pads of the  
 105 microstring from -10 to 10 V/mm which shows ohmic behavior between VO<sub>2</sub> (semiconductor)  
 106 and Au (metal) interface as shown in Figure S4.

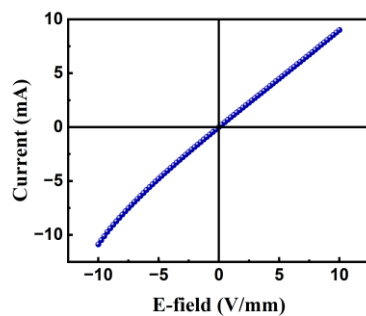

107

108

109

110

Figure S4. Current vs voltage (electric field) characteristics showing ohmic behaviour on the contacts.
